# Supplementary material
Source: publisher figshare collection journal article supplement (https://frontiersin.figshare.com/ndownloader/files/25544903)
Supplement: Supplementary file [file 25544903]

## Supplementary Material 1: NoMAD Measurement Instrument

**This NoMAD Measurement Instrument is designed to help get a better understanding of how to apply and integrate new technologies and complex interventions in health care** (Finch et al., 2015).

This survey asks questions about the implementation of SDM via PHR. We understand that people involved with SDM via PHR have different roles, and that people may have more than one role.

From the statements below please choose an option that best describes ***your main role*** in relation to SDM via PHR:

**I am a *patient*, aged 18-24yrs, responsible for self-management of diabetes** ☐

**I am a *healthcare provider* responsible for the care of diabetic patients using electronic health record systems** ☐

**I am an *organizational provider* responsible for the design, development, implementation or management of electronic health record systems** ☐

For this survey, please answer all the statements from the perspective of this role. Depending on your role or responsibilities in SDM via PHR, some statements may be more relevant than others.

The survey is in 4 sections comprising detailed questions about the implementation of SDM via PHR. For each statement, there is the option to agree or disagree with what is being asked (**OPTION A**). However, if you feel that the statement is not relevant to you, there are also options to tell us why (**OPTION B**).

Please take the time to decide which answer **best suits your experience for each statement and tick the appropriate circle.**

## Detailed questions about the intervention

For each statement please select an answer that best suits your experience using Option A. If the statement is not relevant to you please select an answer from Option B.

[illegible]

**For each statement please select an answer that best suits your experience using Option A. If the statement is not relevant to you please select an answer from Option B.**

[illegible]

**For each statement please select an answer that best suits your experience using Option A. If the statement is not relevant to you please select an answer from Option B.**

[illegible]

6. Sufficient resources would be available to support an integrated SDM via PHR

☐☐☐☐☐☐☐☐

7. Clinic/ Organization management would adequately support an integrated SDM via PHR system

☐☐☐☐☐☐☐☐

**For each statement please select an answer that best suits your experience using Option A. If the statement is not relevant to you please select an answer from Option B.**

[illegible]
